# Supplementary material for: Clinical course and predictors of 60-day mortality in 239 critically ill patients with COVID-19: a multicenter retrospective study from Wuhan, China
Source: Springer Nature journal article supplement (doi:10.1186/s13054-020-03098-9), 2020-07-06
Supplement: MOESM1 [file 18151424]

**S1. Symptoms of 239 critically ill patients with COVID-19**

| <b>Symptoms</b> | <b>All patients (n=239)</b> |
|-----------------|-----------------------------|
| Fever           | 218 (91.2%)                 |
| Cough           | 178 (74.5%)                 |
| Dyspnea         | 119 (49.79%)                |
| Sore throat     | 11 (4.6%)                   |
| Myalgia         | 20 (8.47%)                  |
| Malaise         | 68 (28.5 %)                 |
| Rhinorrhea      | 3 (1.3 %)                   |
| Arthralgia      | 7 (3.0%)                    |
| Chest pain      | 9 (3.8%)                    |
| Headache        | 8 (3.4%)                    |
| Vomiting        | 6 (2.9%)                    |
| Diarrhea        | 8 (3.4%)                    |

Data were expressed as count (%).
